# Supplementary material for: Tailoring the selectivity of glycerol oxidation by tuning the acid–base properties of Au catalysts
Source: Royal Society of Chemistry journal article supplement (doi:10.1039/c4cy01246a), 2014-10-17

## Supporting Information

Tailoring the selectivity to glyceraldehyde by tuning the acid-based properties of Au catalysts

Alberto Villa, Sebastiano Campisi, K. M. H. Mohammed, Nikolaos Dimitratos, Floriana Vindigni, Maela Manzoli, Wilm Jones, Michael Bowker, Graham Hutchings, and Laura Prati

# S1 Reaction profile for AuPt based catalysts

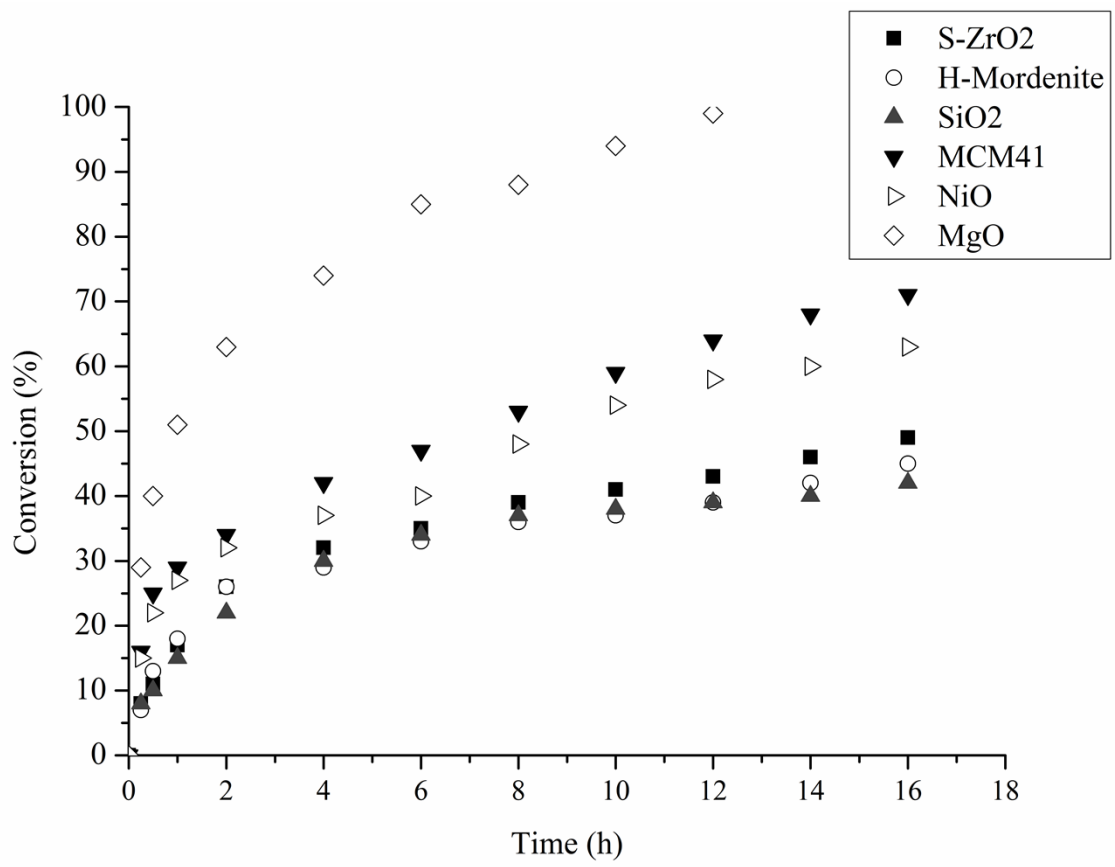

S2 Recycling tests using AuPt/MCM41

Glycerol 0.3M in water; metal/alcohol = 1/500 mol/mol; 300kPa O<sub>2</sub>; T=80°C.

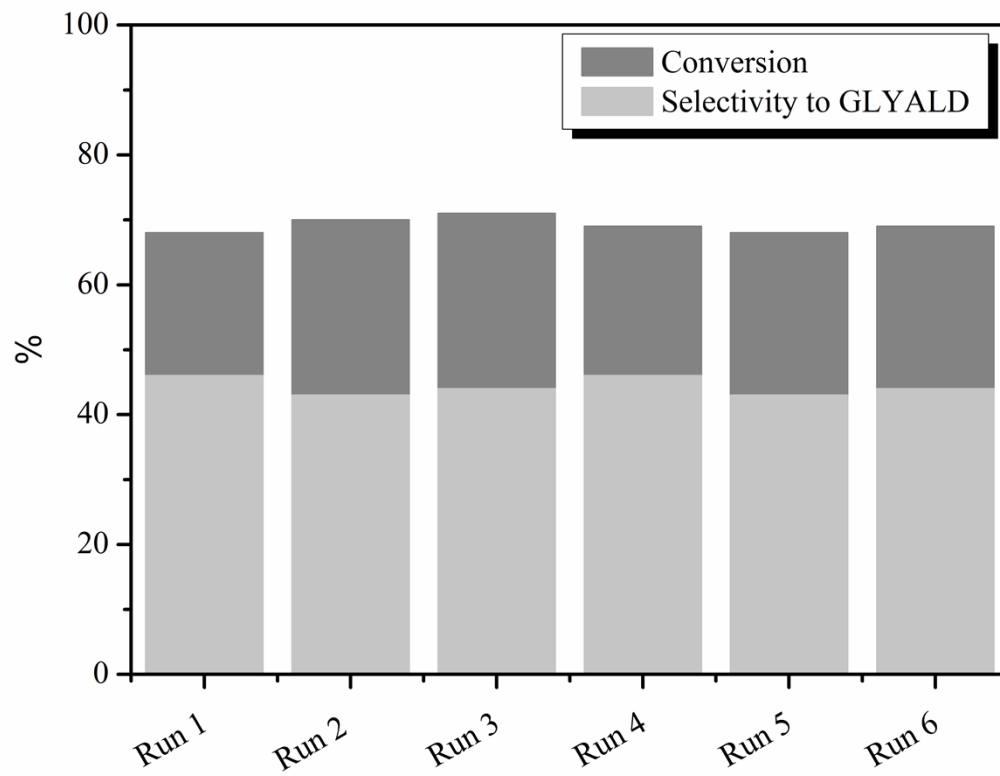

S3 Small angle XRD of AuPt/MCM-41 a) before and b) after reaction

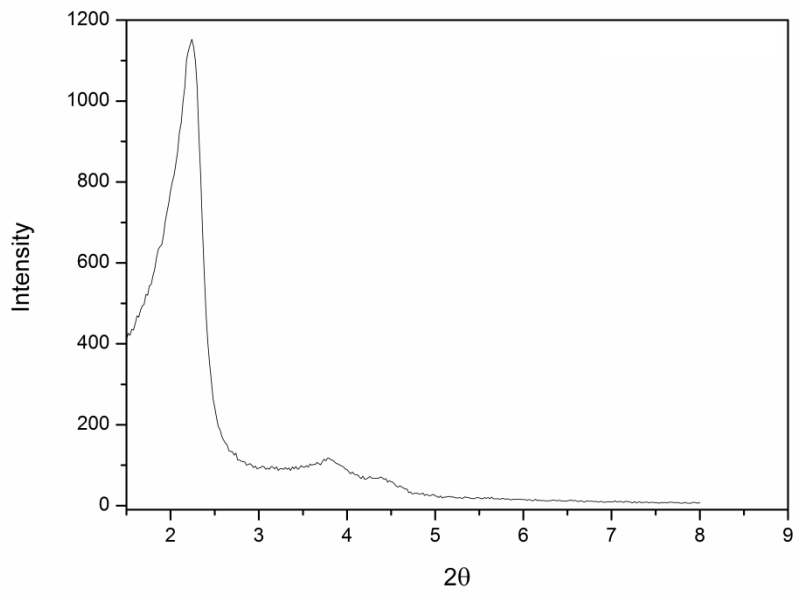

a)

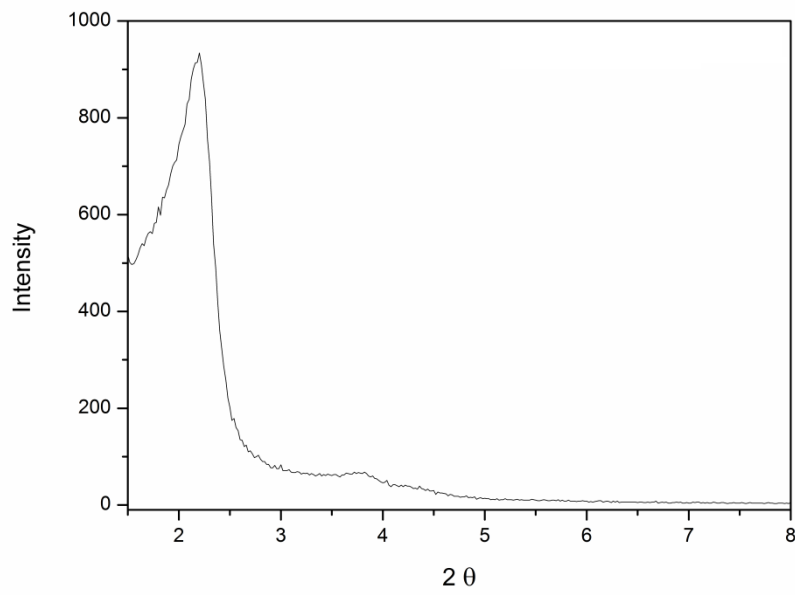

b)

S4

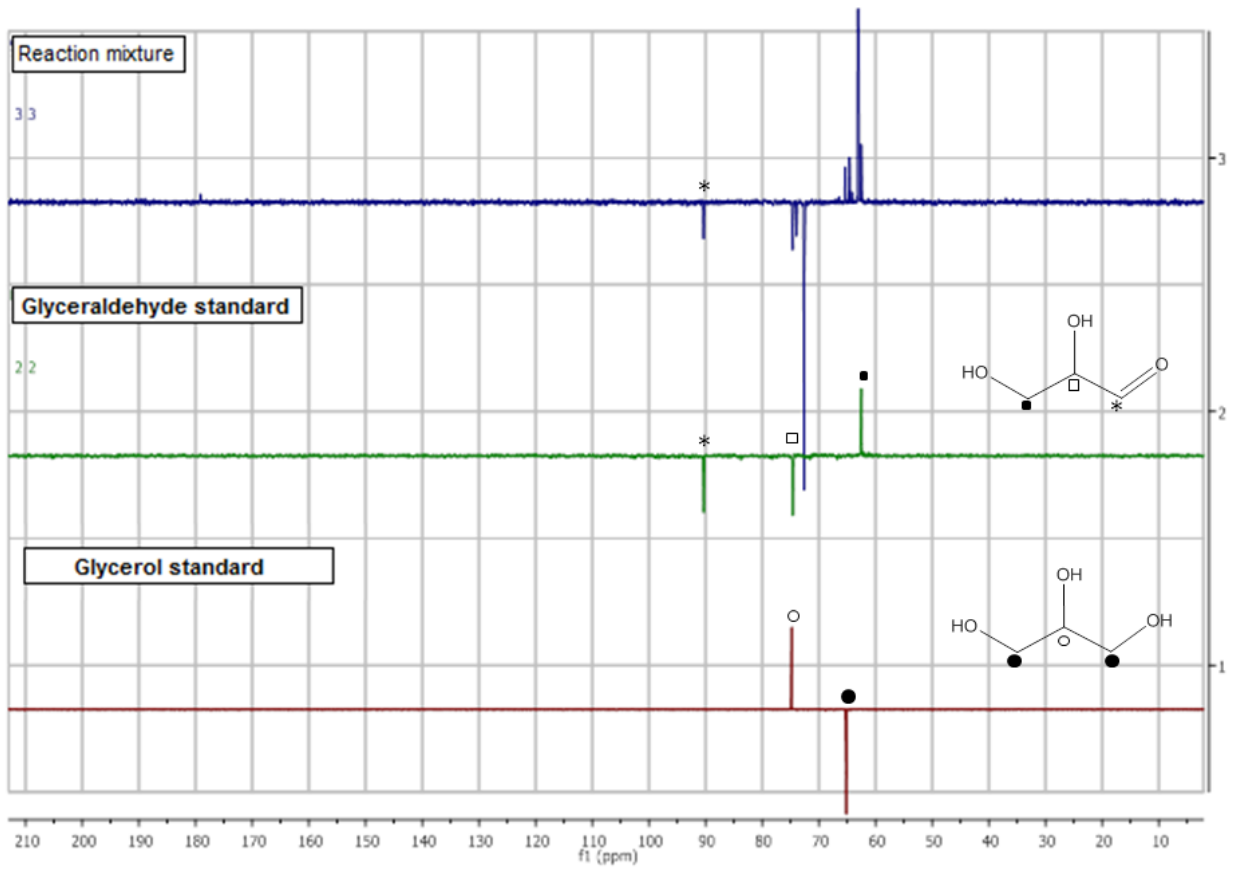

S5: Effect of the reaction temperature using 1% Au<sub>6</sub>Pt<sub>4</sub>/MCM41

| Reaction temperature | Activity                                                  | Selectivity (%) <sup>b</sup> |        |    |       |     |
|----------------------|-----------------------------------------------------------|------------------------------|--------|----|-------|-----|
|                      | mol (AuPt mol) <sup>-1</sup> h <sup>-1</sup> <sup>a</sup> | GLYA                         | GLYALD | TA | C2/C1 | DHA |
| 40°C                 | 112                                                       | 31                           | 55     | -  | -     | 14  |
| 60°C                 | 173                                                       | 37                           | 50     | 1  | -     | 12  |
| 80°C                 | 228                                                       | 35                           | 46     | 1  | -     | 18  |

Reaction conditions: 0.3M glycerol, glycerol/metal=500mol/mol, 3atm O<sub>2</sub>, a) Mol of glycerol converted per hour per mol of metal, calculated after 15 min reaction b) Selectivity calculated at 30% conversion GLYA=glyceric acid; GLYALD=glyceraldehyde; TA=tartronic acid; DHA=dihydroxyacetone

S6 TEM and EDS analysis performed on the AuPt/MCM-41 catalyst. Instrumental magnification: 50000X; Inset: 200000X.

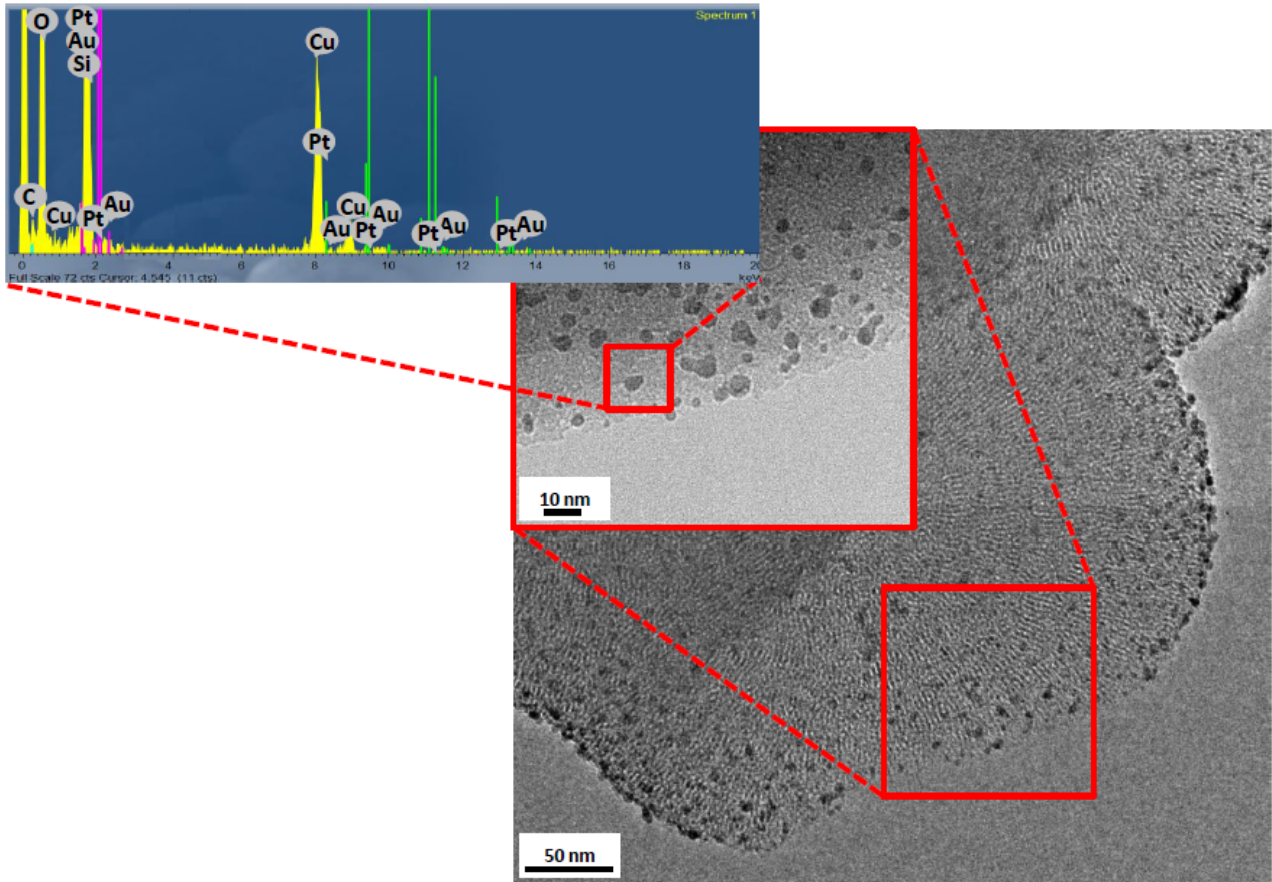

| Element | Weight %    |
|---------|-------------|
| C       | 2.31 ±0.16  |
| O       | 37.30±0.35  |
| Si      | 39.41±0.32  |
| Au      | 0.73 ± 0.17 |
| Pt      | 0.27 ± 0.11 |
| Cu      | 19.98±0.25  |

(The signals of carbon and copper are due to the grid).

S7 Statistical median and standard deviation of particle size analysis for AuPt based catalysts

| <i>Catalyst</i>         | <i>Statistical median (nm)</i> | <i>Deviation standard (<math>\sigma</math>)</i> |
|-------------------------|--------------------------------|-------------------------------------------------|
| AuPt/S-ZrO <sub>2</sub> | 6.9                            | 3.3                                             |
| AuPt/H-Mordenite        | 6.2                            | 3.2                                             |
| AuPt/SiO <sub>2</sub>   | 7.5                            | 3.4                                             |
| AuPt/MCM41              | 6.7                            | 3.2                                             |



S8 FTIR spectra of NH<sub>3</sub> adsorbed at 373 K on AuPt/H-Mordenite .

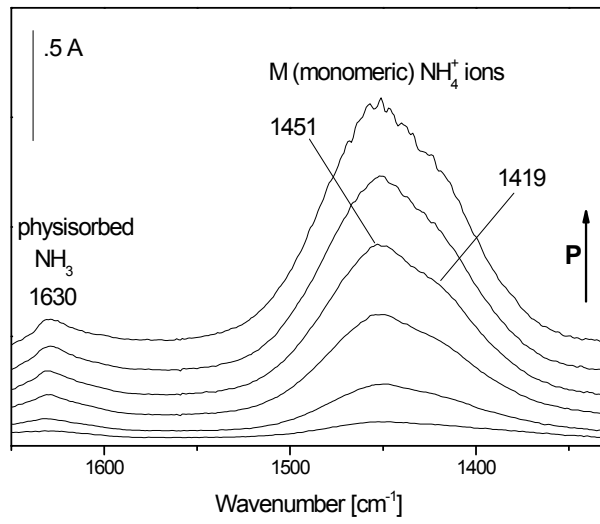

S9  $Q_{\text{int}}$  as function of the  $\mu\text{mol}$  of adsorbed  $\text{NH}_3$ : (-■-) AuPt/MCM41; (-□-) AuPt/SiO<sub>2</sub>; (-∞-) AuPt/H-Mord; (-⊕-) AuPt/S-ZrO<sub>2</sub>;

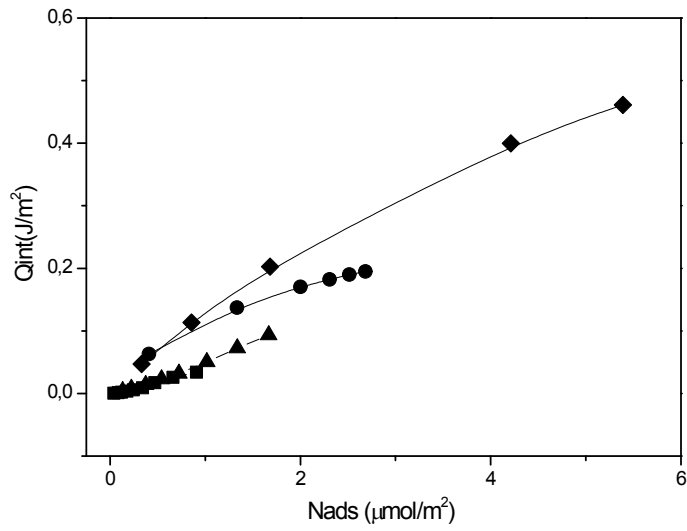

Supplement: c4cy01246a1.pdf [file c4cy01246a1.pdf]
